# Supplementary material for: Uniformly anchoring Sb2O5 nanoparticles on graphene sheets via Co2+-induced deposition for enhanced lithium/sodium-ion storage
Source: Royal Society of Chemistry journal article supplement (doi:10.1039/d4qi00827h), 2024-01-01
Supplement: d4qi00827h1.pdf [file d4qi00827h1.pdf]

## Supporting Information

### **Uniformly anchoring Sb<sub>2</sub>O<sub>5</sub> nanoparticles on graphene sheets via Co<sup>2+</sup>-induced deposition for enhanced lithium/sodium-ion storage**

Xiaozhong Zhou,<sup>\*a</sup> Aixia Wang,<sup>a</sup> Xiaoyan Zheng,<sup>a</sup> Dongfei Sun,<sup>a</sup> Yaoxia Yang<sup>a</sup>

<sup>a</sup> *Key Laboratory of Eco-functional Polymer Materials of the Ministry of Education, College of Chemistry and Chemical Engineering, Northwest Normal University, Lanzhou 730070, Gansu, China.*

*\* Corresponding author, E-mail: zxz20004@163.com.*

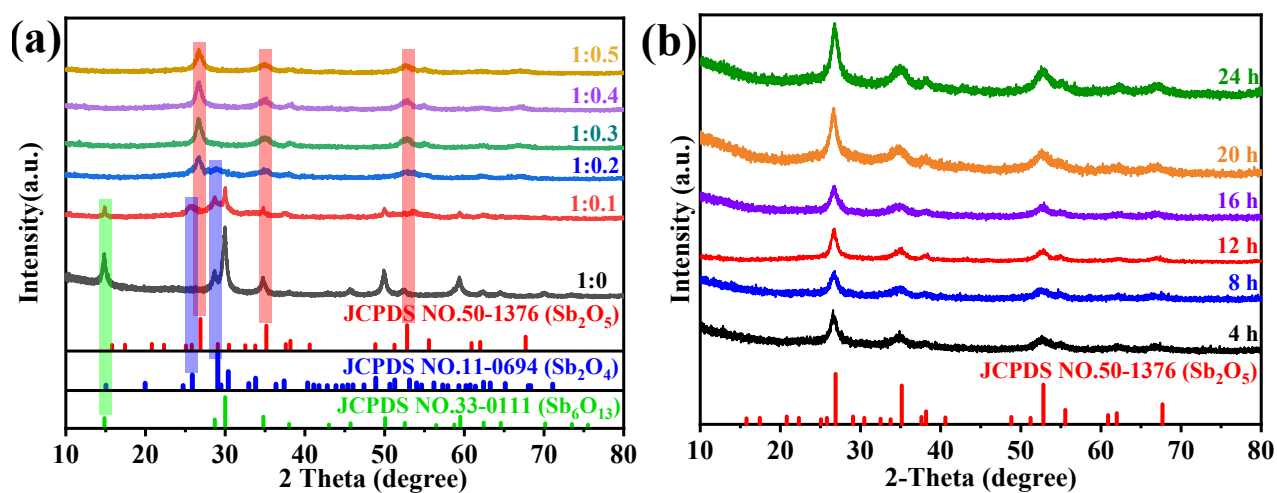

Figure S1 XRD patterns of Co-Sb<sub>2</sub>O<sub>5</sub>/rGO electrodes with different (a) Sb/Co molar ratios for 12-h solvothermal treatment and (b) solvothermal time at a certain Sb/Co molar ratio of 1:0.3.

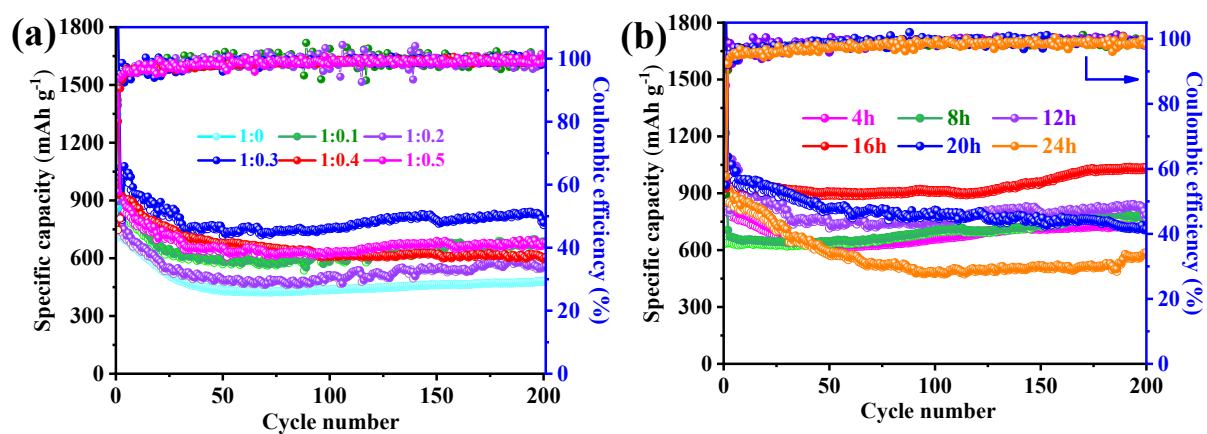

Figure S2 Cycling stability of Co-Sb<sub>2</sub>O<sub>5</sub>/rGO electrodes with different (a) Sb/Co molar ratios for 12-h solvothermal treatment and (b) solvothermal time at a certain Sb/Co molar ratio of 1:0.3.

**Table S1.** Comparison on electrochemical performance of  $Sb_xO_y$ -based electrodes for LIB and SIB applications.

| Materials                                 | Initial reversible capacity<br>(mAh g <sup>-1</sup> / A g <sup>-1</sup> ) | Capacity after (x) cycles<br>(mAh g <sup>-1</sup> / cycles) | Capacity at high rate<br>(mAh g <sup>-1</sup> / A g <sup>-1</sup> ) | Long-term cycling capacity after<br>(x) cycles (mAh g <sup>-1</sup> / A g <sup>-1</sup> / cycles) | Potential<br>(V) | Ref.         |
|-------------------------------------------|---------------------------------------------------------------------------|-------------------------------------------------------------|---------------------------------------------------------------------|---------------------------------------------------------------------------------------------------|------------------|--------------|
| Sb <sub>2</sub> O <sub>3</sub> thin films | LIB: 794 / -                                                              | LIB: ~750 / 70                                              | -                                                                   | -                                                                                                 | 0.01-3           | 1            |
| Sb <sub>2</sub> O <sub>3</sub> /rGO       | LIB: 899 / 0.05                                                           | LIB: 562 / 100                                              | LIB: 155 / 0.3                                                      | -                                                                                                 | 0.01-3           | 2            |
| Sb <sub>2</sub> O <sub>3</sub> /rGO       | LIB: 855 / 0.2                                                            | LIB: 513 / 300                                              | LIB: 397 / 2                                                        | -                                                                                                 | 0.01-3           | 3            |
| Sb <sub>2</sub> O <sub>3</sub> /rGO       | LIB: 1355 / 0.1                                                           | LIB: 808 / 120                                              | LIB: 188 / 5                                                        | LIB: 525 / 0.6 / 700                                                                              | 0.01-3           | 4            |
| Sb <sub>2</sub> O <sub>4</sub> /rGO       | LIB: 1170 / 0.1                                                           | LIB: 798 / 200                                              | LIB: 320 / 3                                                        | LIB: 428 / 0.55 / 500                                                                             | 0.01-3           | 5            |
| Sb <sub>2</sub> O <sub>4</sub> @PPy       | LIB: 989.4 / 0.1                                                          | LIB: 932 / 100                                              | LIB: 552.8 / 2                                                      | LIB: 542.8 / 1.0 / 250                                                                            | 0.01-3           | 6            |
| hollow Sb <sub>2</sub> O <sub>4</sub>     | LIB: 727.1 / 0.1                                                          | LIB: 700 / 50                                               | LIB: 370.9 / 2                                                      | LIB: 415 / 1 / 100                                                                                | 0.01-3           | 7            |
| Sb <sub>6</sub> O <sub>13</sub> /rGO      | LIB: 1271 / 0.1                                                           | LIB: 1109 / 140                                             | LIB: 201 / 3                                                        | LIB: 430 / 0.5 / 300                                                                              | 0.01-3           | 8            |
| Sb <sub>6</sub> O <sub>13</sub> @C        | SIB: 337 / 0.1                                                            | SIB: 375 / 125                                              | SIB: 239 / 1                                                        | -                                                                                                 | 0.005-2.5        | 9            |
| Mn-polyantimonic<br>acide (PAA)           | -                                                                         | LIB: 544 / 100                                              | LIB: 271 / 5                                                        | LIB: 700 / 800                                                                                    | 0.01-3           | 10           |
| V-PAA                                     | LIB: 934 / 0.1                                                            | -                                                           | LIB: 560 / 5                                                        | LIB: 731 / 1 / 1200                                                                               | 0.01-3           | 11           |
| PAA/rGO                                   | LIB: 847 / 0.1                                                            | -                                                           | LIB: 258 / 10                                                       | LIB: 509 / 1 / 800                                                                                | 0.01-3           | 12           |
| Sb <sub>2</sub> O <sub>3</sub> -Fe-C      | LIB: 770 / 0.5<br>SIB: 319 / 0.1                                          | LIB: 658 / 100                                              | LIB: 680.3 / 10<br>SIB: 182 / 10                                    | LIB: 546.6 / 1 / 1000<br>SIB: 226.8 / 1 / 300                                                     | 0.01-3           | 13           |
| Sb <sub>2</sub> O <sub>5</sub> /Co-C      | LIB: 1102 / 0.1                                                           | LIB: 1009 / 100                                             | LIB: 647.2 / 1                                                      | LIB: 462.8 / 1 / 700                                                                              | 0.01-3           | 14           |
| Co-Sb <sub>2</sub> O <sub>5</sub> /rGO    | LIB: 916.8 / 0.2<br>SIB: 441.1 / 0.1                                      | LIB: 1027 / 200<br>SIB: 352.3 / 100                         | LIB: 507.3 / 3<br>SIB: 252.3 / 1                                    | LIB: 648.1 / 0.5 / 500                                                                            | 0.01-3.0         | This<br>work |

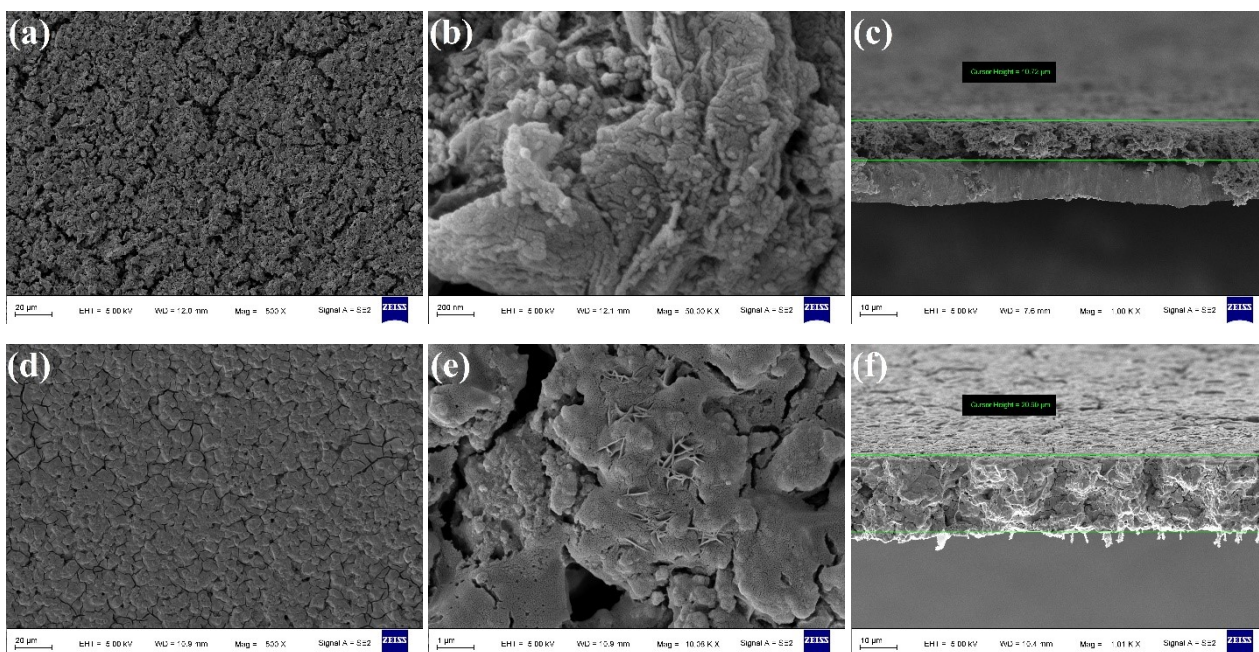

Figure S3 Top-view surface and cross-sectional SEM images of Co-Sb<sub>2</sub>O<sub>5</sub>@rGO electrodes before cycling (a, b, c) and after 200 cycles (d, e, f).

## Reference

1. M.-Z. Xue and Z.-W. Fu, Electrochemical reaction of lithium with nanostructured thin film of antimony trioxide, *Electrochem. Commun.*, 2006, **8**, 1250-1256.
2. J. Zhou, C. Zheng, H. Wang, J. Yang, P. Hu and L. Guo, 3D nest-shaped  $\text{Sb}_2\text{O}_3/\text{RGO}$  composite based high-performance lithium-ion batteries, *Nanoscale*, 2016, **8**, 17131-17135.
3. X. Chen, T. Yao, H. Dong, Q. Ge, S. Chen and Z. Ma, Ultrafine  $\text{Sb}_2\text{O}_3$  nanoparticle-decorated reduced graphene oxide as an anode material for lithium-ion batteries, *Energy Fuels*, 2023, **37**, 5586-5594.
4. X. Zhou, Z. Zhang, X. Lu, X. Lv, G. Ma, Q. Wang and Z. Lei,  $\text{Sb}_2\text{O}_3$  Nanoparticles Anchored on Graphene Sheets via Alcohol Dissolution-Reprecipitation Method for Excellent Lithium-Storage Properties, *ACS Appl. Mater. Interfaces*, 2017, **9**, 34927-34936.
5. X. Zhou, Z. Zhang, J. Wang, Q. Wang, G. Ma and Z. Lei,  $\text{Sb}_2\text{O}_4/\text{reduced}$  graphene oxide composite as high-performance anode material for lithium ion batteries, *J. Alloy. Compd.*, 2017, **699**, 611-618.
6. L. Jiang, W. Yin, C. He, T. Luo, Y. Rui and B. Tang,  $\text{Sb}_2\text{O}_4@\text{PPy}$  core-shell nanospheres as anode materials for lithium-ion storage, *Colloid. Surfaces A*, 2022, **644**, 128843.
7. Z. Yi, Q. Han, X. Li, Y. Wu, Y. Cheng and L. Wang, Two-step oxidation of bulk Sb to one-dimensional  $\text{Sb}_2\text{O}_4$  submicron-tubes as advanced anode materials for lithium-ion and sodium-ion batteries, *Chem. Eng. J.*, 2017, **315**, 101-107.
8. X. Zhou, Z. Zhang, X. Xu, J. Yan, G. Ma and Z. Lei, Anchoring  $\text{Sb}_6\text{O}_{13}$  Nanocrystals on Graphene Sheets for Enhanced Lithium Storage, *ACS Appl. Mater. Interfaces*, 2016, **8**, 35398-35406.
9. S. Liao, X. Wang, H. Hu, D. Chen, M. Zhang and J. Luo, Carbon-encapsulated  $\text{Sb}_6\text{O}_{13}$  nanoparticles for an efficient and durable sodium-ion battery anode, *J. Alloy. Compd.*, 2021, **852**, 156939.
10. K. Yong, H. Fang, B. Wang, X. Qiu, K. Wu, Q. Wang, Y. Zhang and H. Wu, Synergistic structural engineering of tunnel-type polyantimonic acid enables dual-boosted volumetric and areal lithium energy storage, *Adv. Energy Mater.*, 2022, **12**, 2200653.
11. H. Fang, K. Yong, B. Wang, K. Wu, Y. Zhang and H. Wu, V-substituted pyrochlore-type polyantimonic acid for highly enhanced lithium-ion storage, *Chin. Chem. Lett.*, 2023, **34**, 107545.
12. B. Wang, Z. Deng, Y. Xia, J. Hu, H. Li, H. Wu, Q. Zhang, Y. Zhang, H. Liu and S. Dou, Realizing reversible conversion-alloying of Sb(V) in polyantimonic acid for fast and durable lithium- and potassium-ion storage, *Adv. Energy Mater.*, 2020, **10**, 1903119.
13. X. Shi, W. Liu, H. Xue, B. Chen, C. Wang, L. Sun, L. Chang, Y. Cheng and L. Wang, An exploration on the improvement of reversible conversion and capacity retention of  $\text{Sb}_2\text{O}_3$ -based anode materials for alkali metal-ion storage by Fe-C co-hybridization, *J. Power Sources*, 2021, **506**, 230074.
14. J. Li, L. Han, X. Zhang, G. Zhu, T. Chen, T. Lu and L. Pan,  $\text{Sb}_2\text{O}_5/\text{Co}$ -containing carbon polyhedra as anode material for high-performance lithium-ion batteries, *Chem. Eng. J.*, 2019, **370**, 800-809.
